# Supplementary material
Source: HighWire-hosted journal article supplement (http://www.qdcxjkg.com/highwire/filestream/126480/field_highwire_adjunct_files/2/supplement_6.pdf)
Supplement: supplement_6.pdf [file supplement_6.pdf]

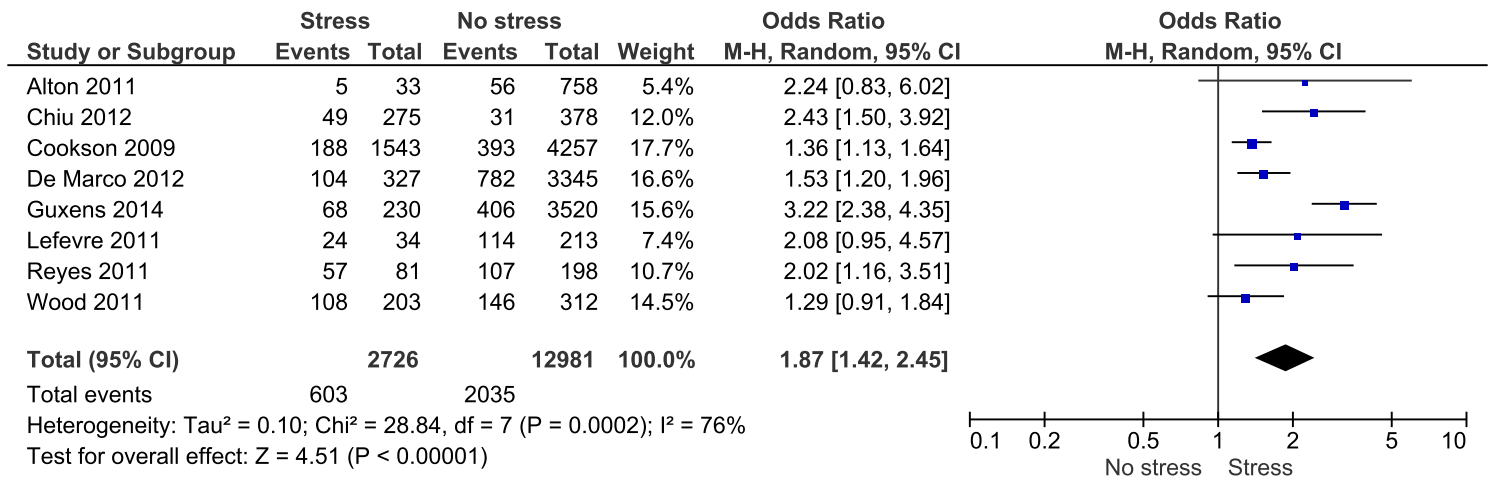

**S6:** Forest plot of the meta-analysis (dichotomous measures) on the association between any form of prenatal maternal psychological stress and wheezing in childhood.
